# Supplementary material for: Magnetic mesoporous nanomaterials with AIE properties for selective detection and removal of CN− from water under magnetic conditions
Source: Royal Society of Chemistry journal article supplement (doi:10.1039/d1an01152a), 2021-01-01
Supplement: d1an01152a1.pdf [file d1an01152a1.pdf]

# Supporting Information

## Magnetic Mesoporous Nanomaterials with AIE Properties for Selective Detection and Removal of $\text{CN}^-$ from Water under Magnetic Conditions

Bin Zuo, Han Shao, Wanfang Li, Shige Wang, Mingxian Huang, and Qinyue Deng,\*

College of Science, University of Shanghai for Science and Technology, Shanghai 200093, China.

E-mail: [dqy1991@usst.edu.cn](mailto:dqy1991@usst.edu.cn)

### 1. CHARACTERIZATION OF FSTB

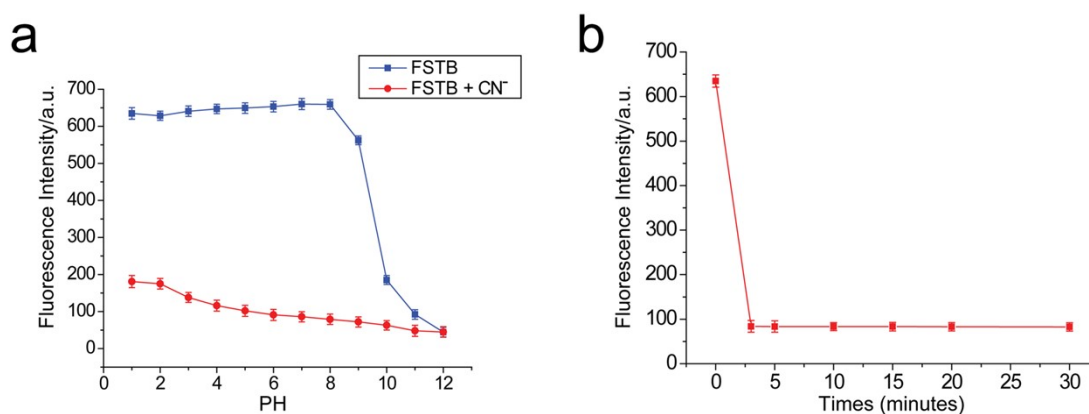

**Figure S1.** (a) The pH effect on the fluorescence intensity of the **FSTB** and **FSTB** +  $\text{CN}^-$ ; (b) The fluorescence intensity of **FSTB** toward  $\text{CN}^-$  as a function of time.

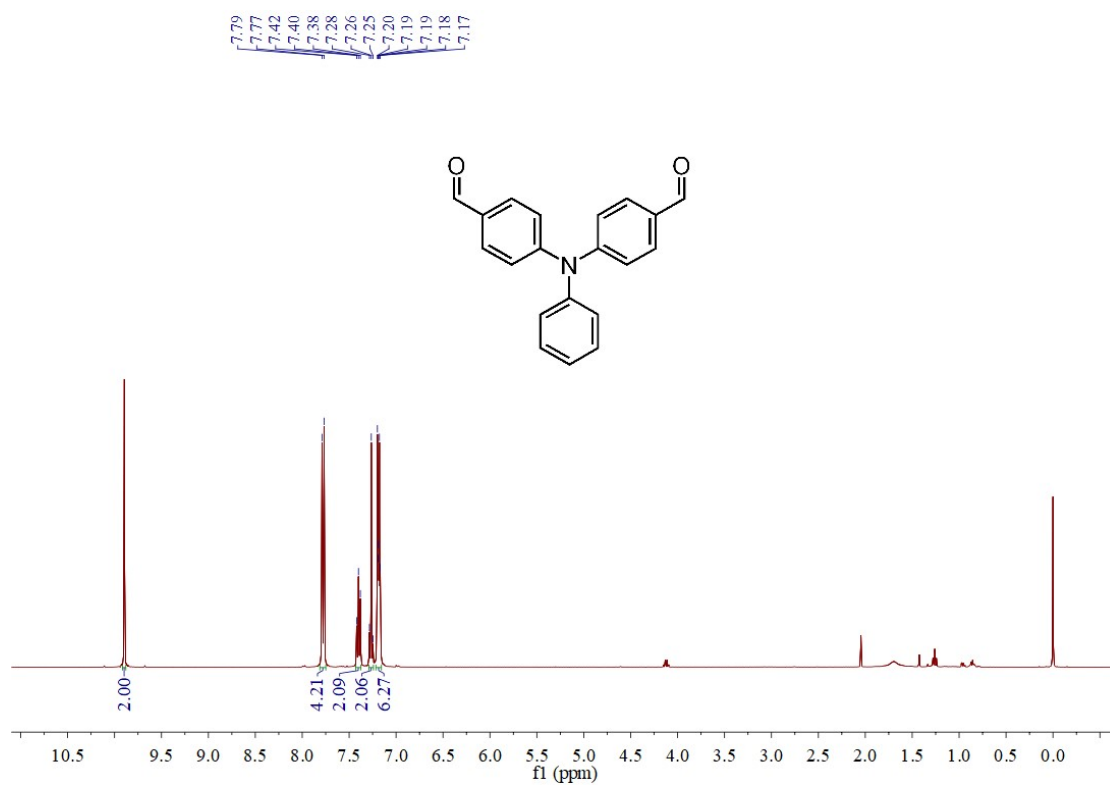

**Figure S2.** <sup>1</sup>H NMR spectrum of 4,4'-diformyltriphenylamine (a5).

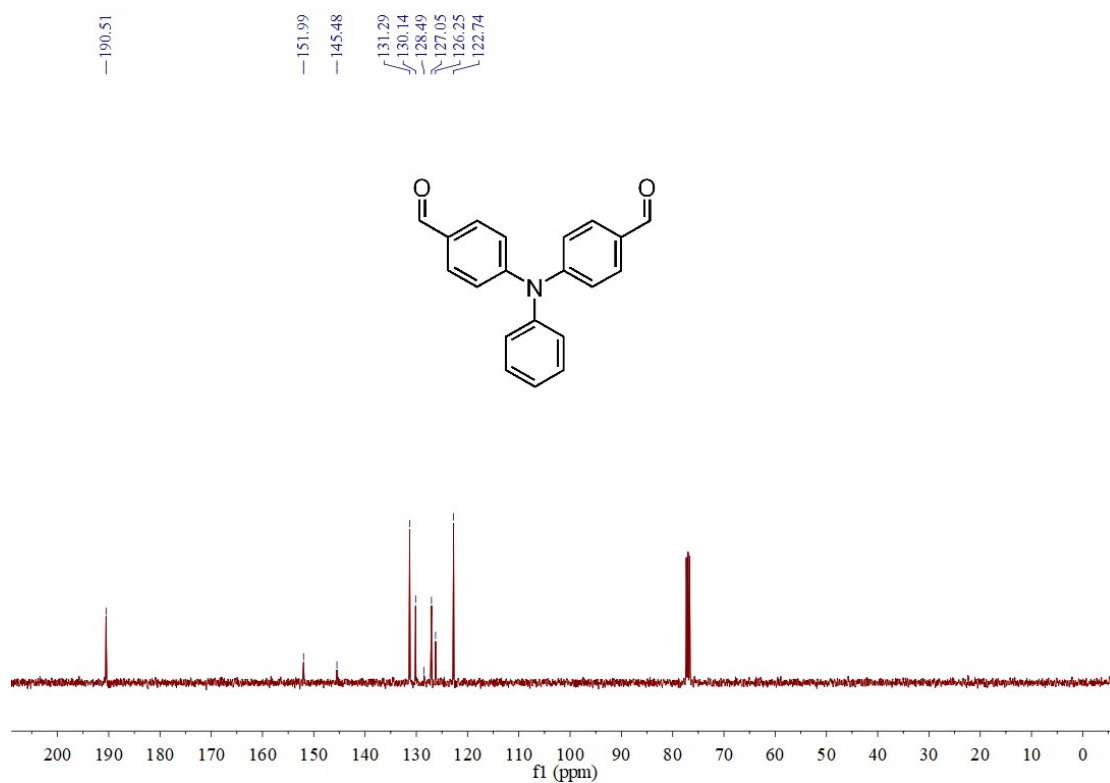

**Figure S3.** <sup>13</sup>C NMR spectrum of 4,4'-diformyltriphenylamine (a5).

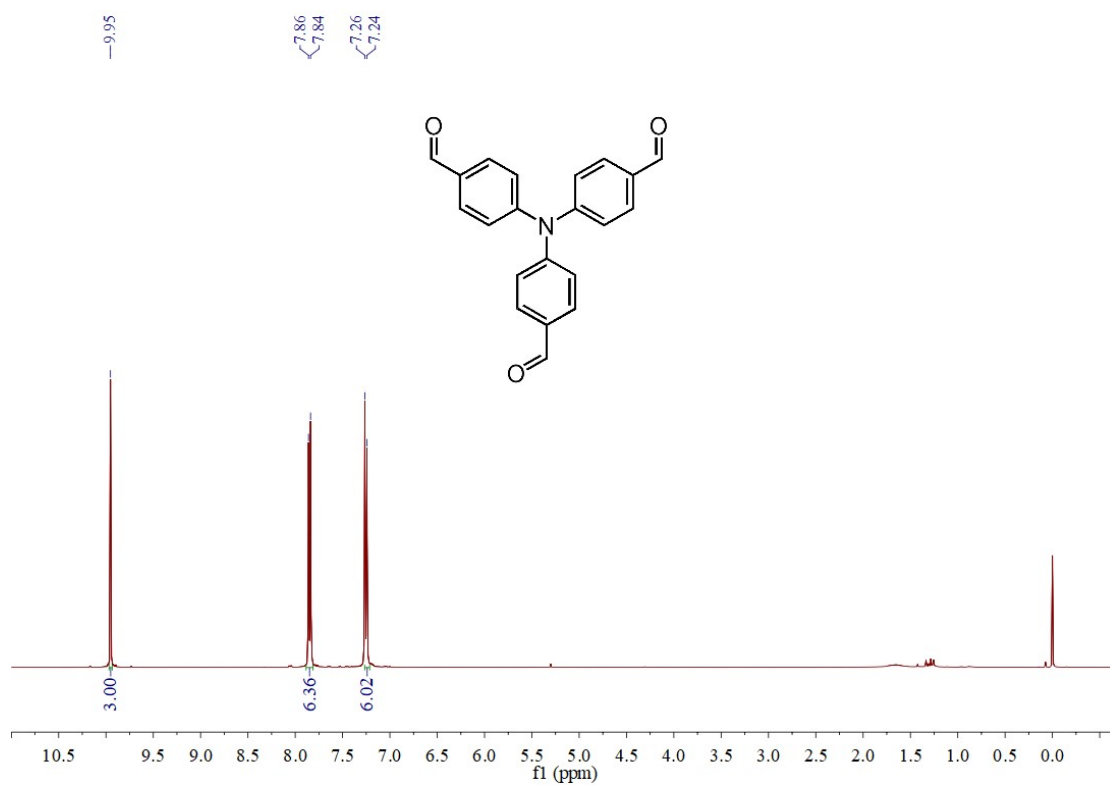

**Figure S4.** <sup>1</sup>H NMR spectrum of Tris(4-formylphenyl)amine (a6).

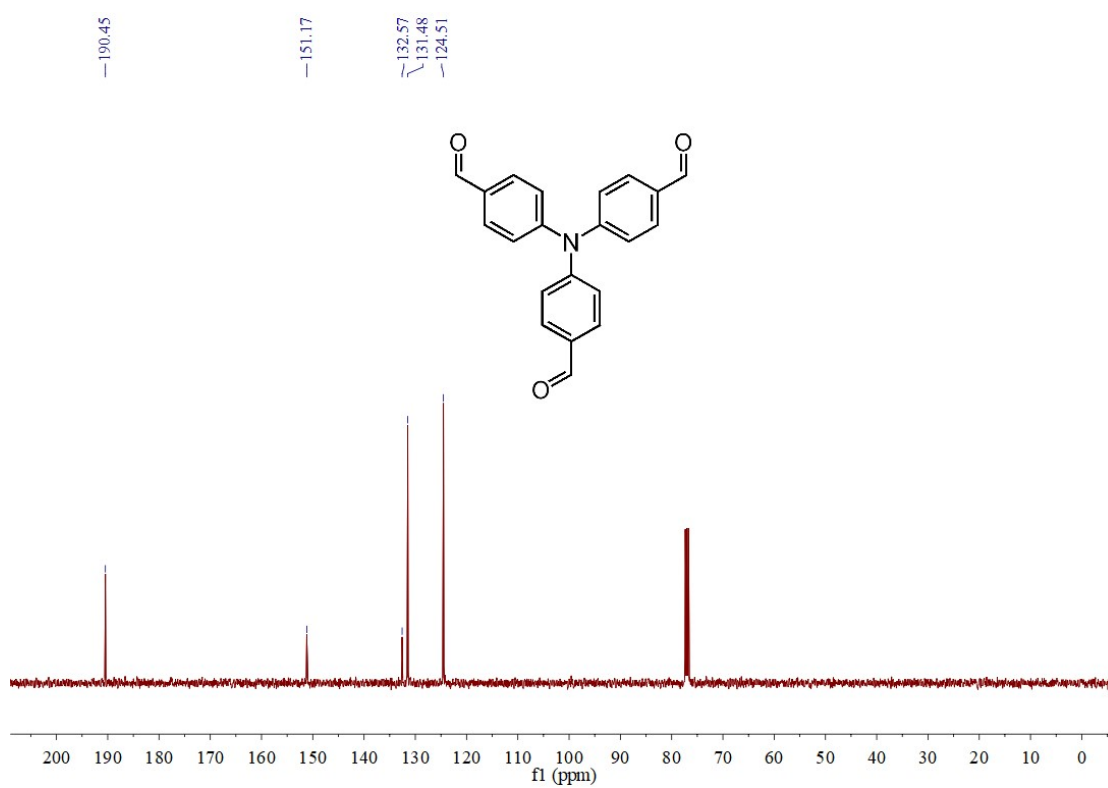

**Figure S5.** <sup>13</sup>C NMR spectrum of Tris(4-formylphenyl)amine (a6).

**The synthetic procedures and NMR spectrum**

The products of **a6** and APTES: the **a6** (0.10 g, 0.3 mmol) and APTES (0.06 g, 0.3 mmol) were heated and stirred in dry methanol (5 mL) under reflux for 12 hours, then the crude product was purified by column chromatography (PE/EA = 10/1) to a yellow solid **a9**. **a9** (55%):  $^1\text{H}$  NMR (400 MHz,  $\text{CDCl}_3$ , 298 K):  $\delta$  = 9.95 (s, 1H), 9.90 (s, 1H), 7.85 (d,  $J$  = 8.4 Hz, 2H), 7.78 (d,  $J$  = 8.5 Hz, 3H), 7.47 (d,  $J$  = 8.4 Hz, 1H), 7.25 (d,  $J$  = 8.9 Hz, 2H), 7.20 (s, 1H), 7.19-7.15 (m, 3H), 5.38 (d,  $J$  = 10.3 Hz, 1H), 3.49 (s, 6H), 3.38 (d,  $J$  = 7.0 Hz, 5H), 1.26 (s, 2H), 1.06 (s, 2H).  $^{13}\text{C}$  NMR (101 MHz,  $\text{CDCl}_3$ , 298 K):  $\delta$  = 190.46, 151.91, 151.19, 145.61, 136.12, 132.62, 131.48, 131.30, 128.49, 128.09, 126.52, 125.73, 124.53, 122.93, 102.89, 53.08, 50.85, 31.49, 30.13, 29.68.

Under an  $\text{N}_2$  atmosphere, **a9** (0.1 g, 0.2 mmol) and barbituric acid (BA) (0.065 g, 0.5 mmol) were heated and stirred in dry ethanol (5 mL) under reflux for 6 hours, washed twice with ethanol, and finally dried under vacuum at 50 °C for 24 hours to obtain a red solid **a10** (75%). Due to the poor solubility of **a10** in deuterated solvents, the corresponding NMR spectrum pictures were not obtained, so we synthesized the products of **a5** and BA, which indirectly proved that BA is bonded to triphenylamine.

Under nitrogen, a mixture of **a5** (0.3 g, 1.0 mmol) and BA (0.4 g, 3.1 mmol) in ethanol (10 mL) was refluxed for 4 h. The residue was purified using column chromatography on silica to afford the product as a red powder **a11** after vacuum dried at 50 °C overnight<sup>1</sup>. **a11** (red solid, 91%):  $^1\text{H}$  NMR (400 MHz,  $\text{DMSO-d}_6$ , 298 K):  $\delta$  = 11.31 (s, 2H), 11.17 (s, 2H), 8.28 (d,  $J$  = 8.8 Hz, 4H), 8.19 (s, 2H), 7.48 (t,  $J$  = 7.7 Hz, 2H), 7.33 (t,  $J$  = 7.3 Hz, 1H), 7.25 (d,  $J$  = 7.9 Hz, 2H), 7.07 (d,  $J$  = 8.7 Hz, 4H).  $^{13}\text{C}$  NMR (101 MHz,  $\text{DMSO-d}_6$ , 298 K):  $\delta$  = 164.27, 162.48, 154.38, 150.62, 150.35, 145.00, 137.12, 130.83, 127.82, 127.42, 121.81, 116.44.

The method used in the main paper is the direct bonding synthesis method, while the successful synthesis of **a9**, **a10** and **a11** demonstrated the feasibility of the compounds prepared by the post-synthesis grafting method to be bound to magnetic microspheres.

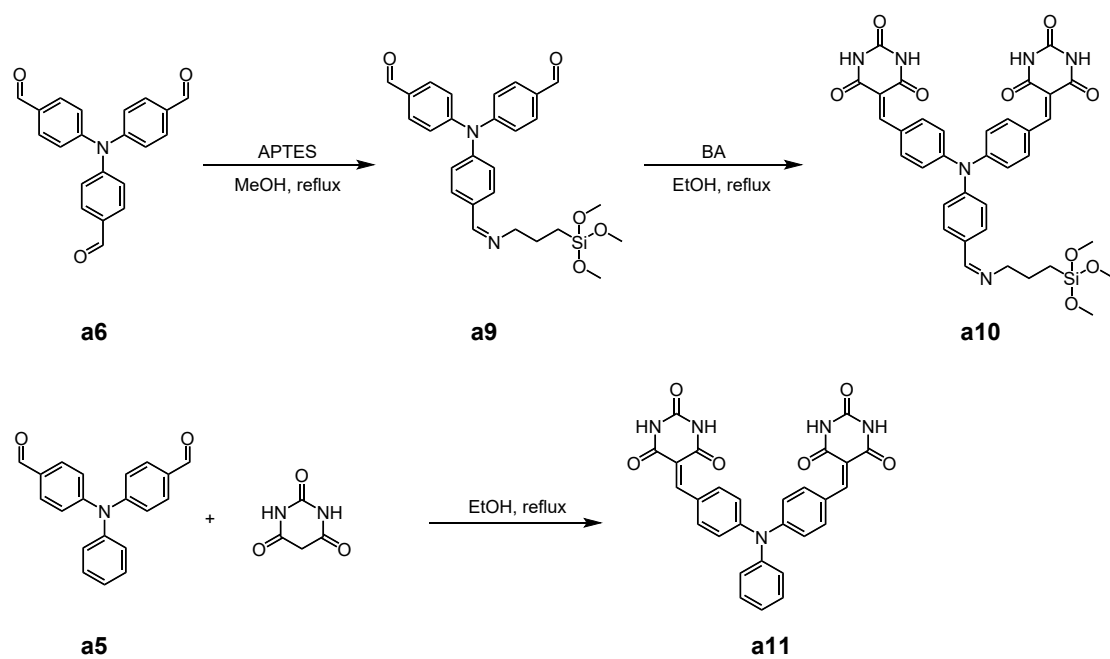

**Scheme 1.** The synthetic procedures of **a9**, **a10** and **a11**.

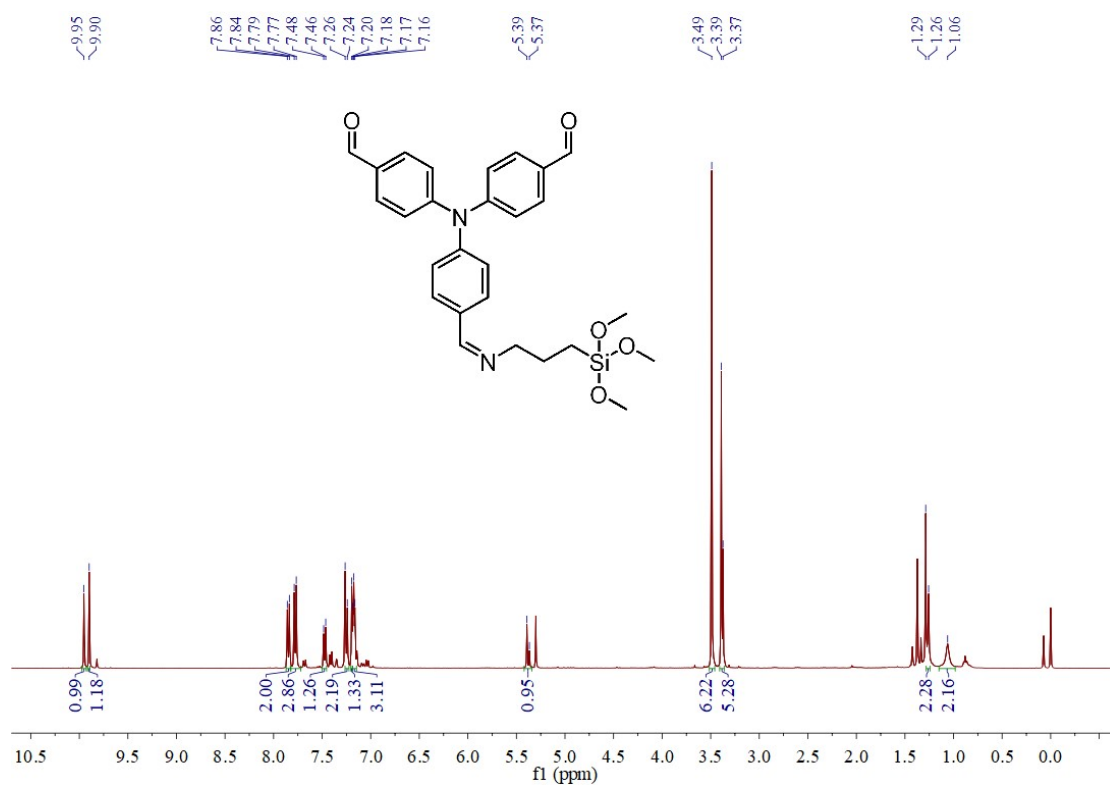

**Figure S6.** <sup>1</sup>H NMR spectrum of **a9**.

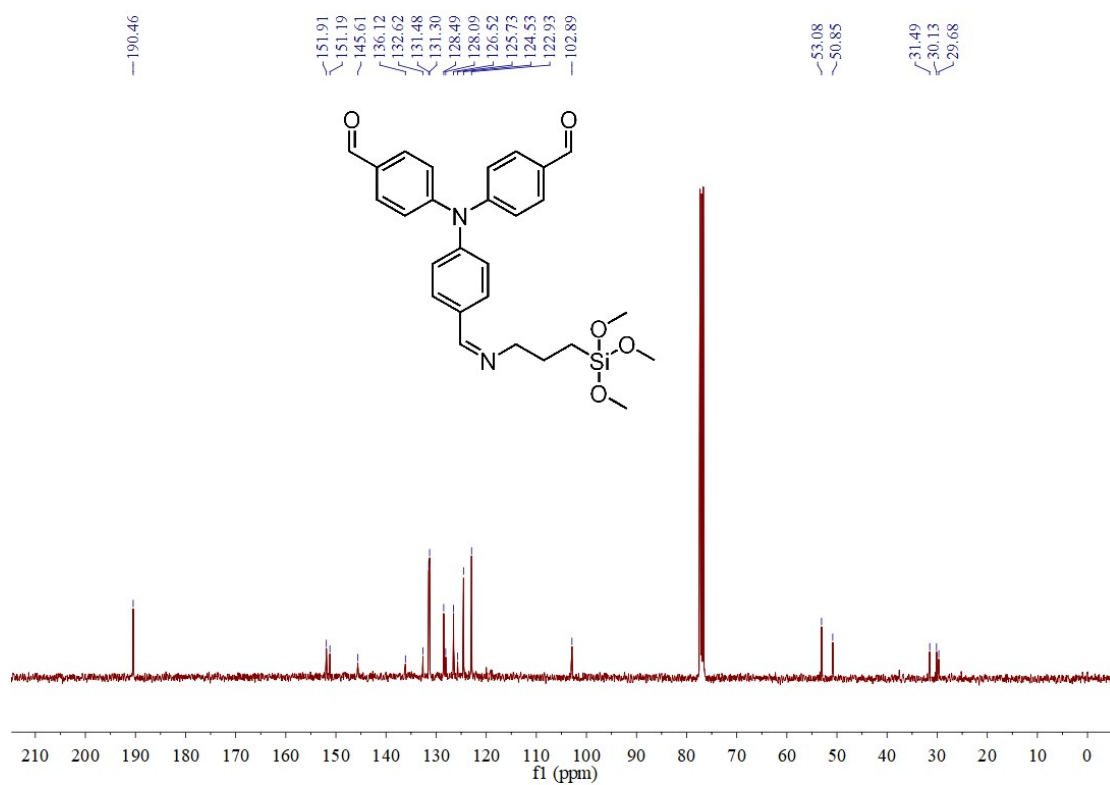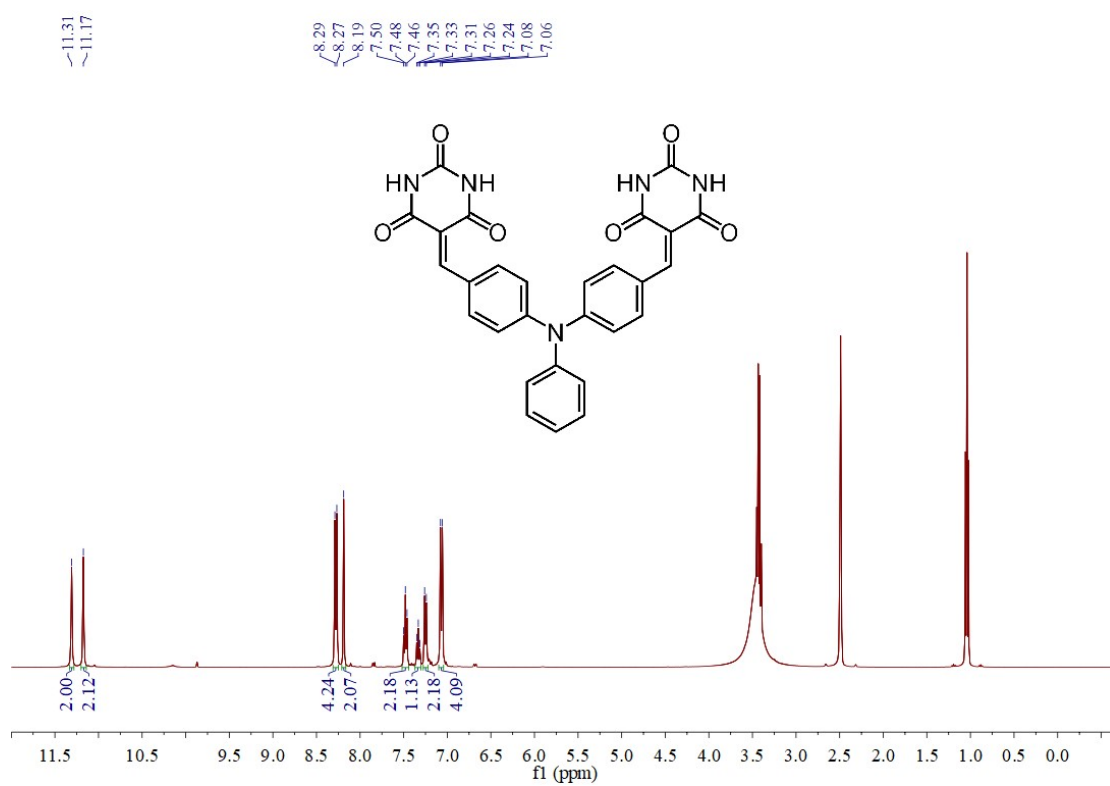

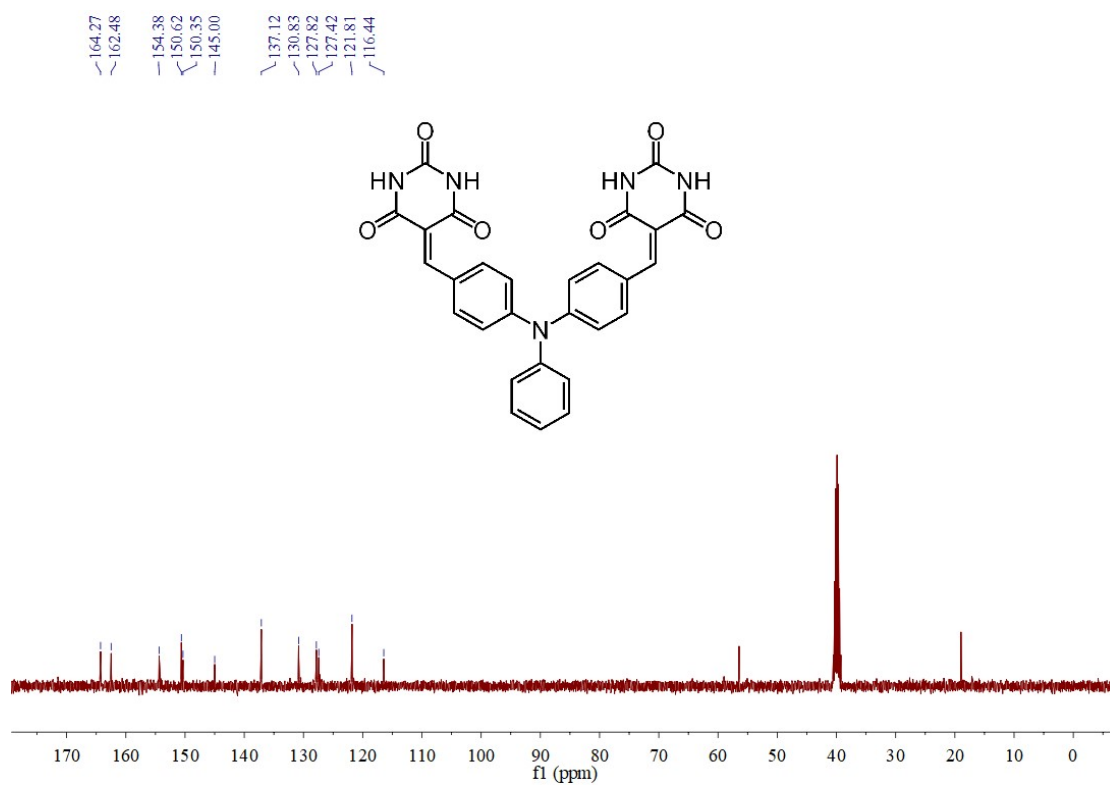

**Figure S9.**  $^{13}\text{C}$  NMR spectrum of **a11**.

**Table S1.** The FSTB compared to prior sensors.

| Probes | LOD/mol L <sup>-1</sup> | Magnetic removal | References |
|--------|-------------------------|------------------|------------|
|        | $2.1 \times 10^{-6}$    | No               | 2          |
|        | $3.83 \times 10^{-6}$   | No               | 3          |
| NP3    | $2.0 \times 10^{-6}$    | No               | 4          |
|        | $2.3 \times 10^{-7}$    | No               | 5          |

|                                                                                   |                       |     |           |
|-----------------------------------------------------------------------------------|-----------------------|-----|-----------|
| 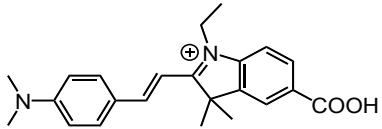 | $3.34 \times 10^{-7}$ | No  | 6         |
| 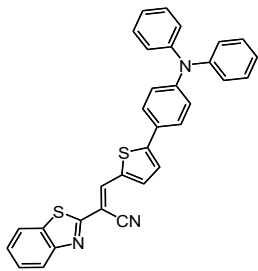 | $4.24 \times 10^{-8}$ | No  | 7         |
| 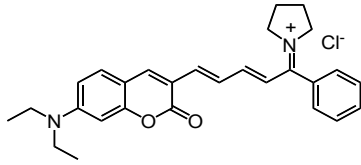 | $7.5 \times 10^{-8}$  | No  | 8         |
| <b>FSTB</b>                                                                       | $2.49 \times 10^{-8}$ | Yes | This work |

## References

1. W. Shi, S. Zhao, Y. Su, Y. Hui and Z. Xie, *New J. Chem.*, 2016, **40**, 7814-7820.
2. K.-Y. Chen and W.-C. Lin, *Dyes Pigments*, 2015, **123**, 1-7.
3. Y. Li, Z. Gu, T. He, X. Yuan, Y. Zhang, Z. Xu, H. Qiu, Q. Zhang and S. Yin, *Dyes Pigments*, 2020, **173**, 107969.
4. S. El Sayed, M. Licchelli, R. Martinez-Manez and F. Sancenon, *Chem. Asian J.*, 2017, **12**, 2670-2674.
5. L. L. Long, X. Q. Yuan, S. Y. Cao, Y. Y. Han, W. G. Liu, Q. Chen, Z. X. Han and K. Wang, *Acs Omega*, 2019, **4**, 10784-10790.
6. J. J. Li, Z. Y. Chang, X. H. Pan, W. Dong and A. Q. Jia, *Dyes Pigments*, 2019, **168**, 175-179.
7. Y. Zhao, L. Feng, X. M. Meng and J. J. Guan, *Dyes Pigments*, 2020, **183**, 108713.
8. L. L. Long, Y. Y. Han, X. Q. Yuan, S. Y. Cao, W. G. Liu, Q. Chen, K. Wang and Z. X. Han, *Food Chem.*, 2020, **331**, 127359.
